# Supplementary material for: Nitrogen-doped hollow carbon spheres with tunable shell thickness for high-performance supercapacitors
Source: Royal Society of Chemistry journal article supplement (doi:10.1039/d0ra02935a), 2020-01-01
Supplement: d0ra02935a1.pdf [file d0ra02935a1.pdf]

## Supporting information

### **Nitrogen-doped Hollow Carbon Spheres with Tunable Shell Thickness for High-Performance Supercapacitor**

**Dawei Zhang, Shaodian Shen, Xiuzhen Xiao, Dongsen Mao, Baoman Yan**

†Research Institute of Applied Catalysis, School of Chemical and Environmental Engineering, Shanghai Institute of Technology, Shanghai, 201418, P. R.China

Table S1 The details of the materials formulations for NHCSs

| Sample no. | Cu <sub>2</sub> O | 3-aminophenol | formaldehyde | Shell thickness |
|------------|-------------------|---------------|--------------|-----------------|
|            | /g                | /g            | /ml          | /nm             |
| S1         | 1.5               | 0.1           | 0.14         | 15              |
| S2         | 1.0               | 0.1           | 0.14         | 32              |
| S3         | 1.0               | 0.2           | 0.28         | 63              |
| S4         | 1.0               | 0.3           | 0.42         | 84              |

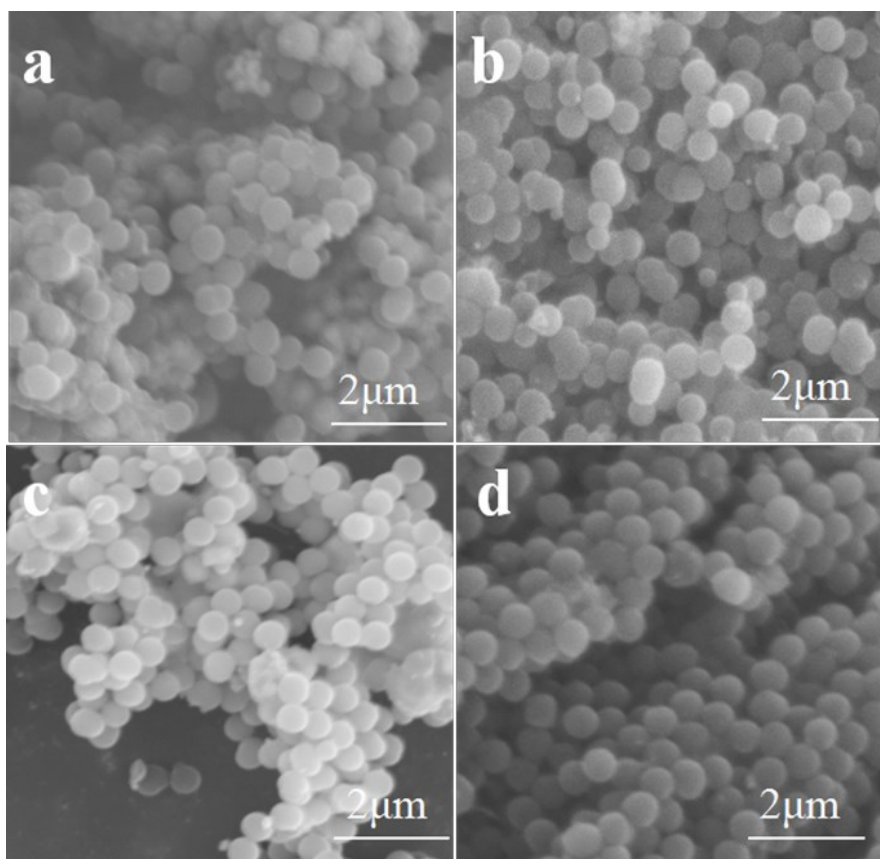

Figure S1 SEM images of NHCSs : (a) S1, (b) S2 , (c) S3 and (d) S4.

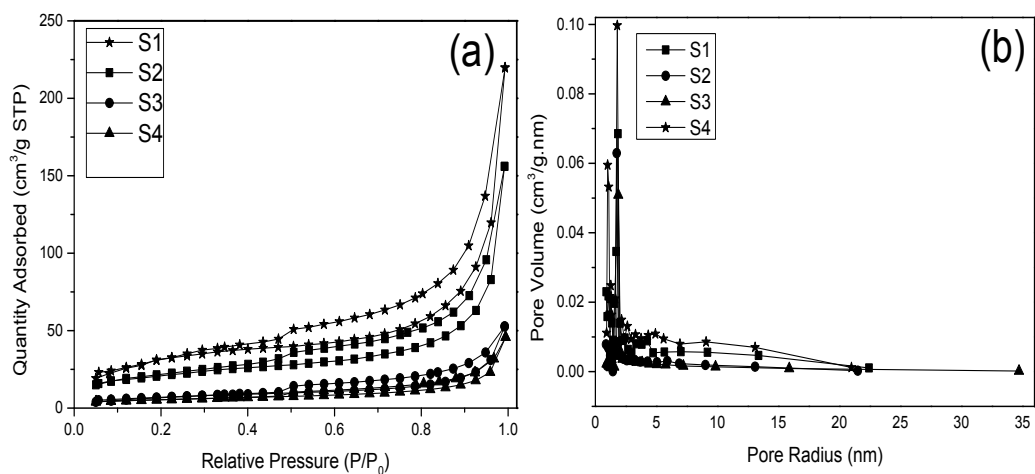

Figure S2. N<sub>2</sub> adsorbed/desorption isotherms (a) and pore size distribution of NHCSs.

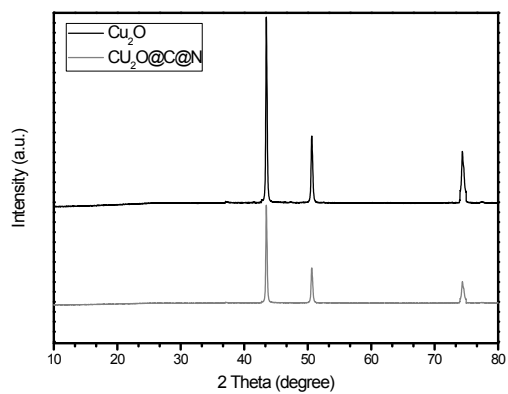

Figure S3. XRD pattern of Cu<sub>2</sub>O microspheres and Cu<sub>2</sub>O@C@N ( before template etching to remove Cu ).

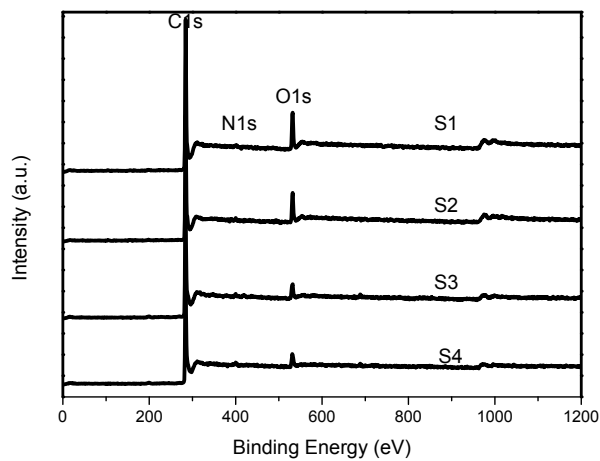

Figure S4. XPS spectrum of NHCSs:

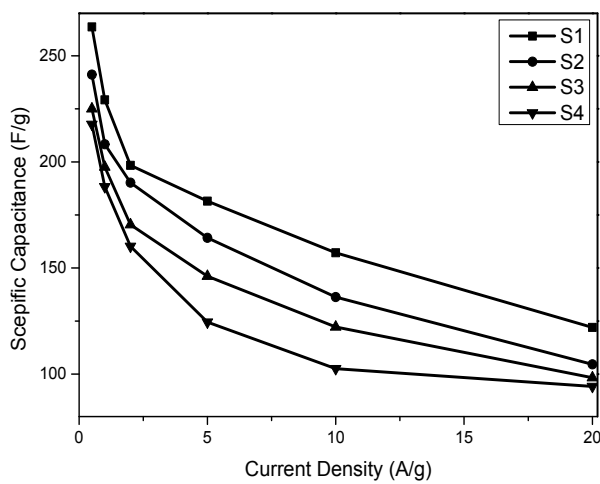

Figure S5. The relationship between specific capacitance values and current densities.( 0.5, 1, 2, 5, 10, 20 A g<sup>-1</sup> )

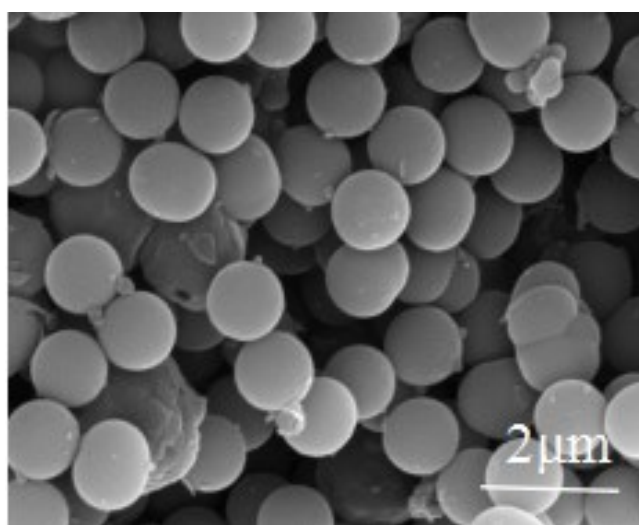

Figure S6. SEM images of S1 estimated by galvanostatic charge-discharge profiles for 1000 cycles at current density of  $5 \text{ A g}^{-1}$ .
